# Supplementary material for: Decline in the Cumulative Incidence of Severe Diabetic Retinopathy in Patients With Type 1 Diabetes
Source: PubMed Central journal article supplement — Diabetes Care. 2011 Aug 19;34(9):2005–7. doi: 10.2337/dc10-2391 (PMC3161282; doi:10.2337/dc10-2391), 2011-08-19
Supplement: supp_34.9.2005v102391_DC102391SupplementaryData.pdf [file supp_34.9.2005v102391_DC102391SupplementaryData.pdf]

## SUPPLEMENTARY DATA

### Acknowledgment

The study was supported by grants from the Eye Foundation Finland, the Finnish Medical Foundation, the Folkhälsan Research Foundation, Wilhelm and Else Stockmann Foundation, Kyllikki ja Uolevi Lehtikoinen Foundation, Mary and Georg C. Ehrnrooth Foundation and the Orion Research Foundation. J.P.K. has worked as Medical Advisor for Pfizer. No potential conflicts of interest relevant to this article were reported. The skilled technical assistance of Sinikka Lindh, Anna-Reetta Salonen, Anna Sandelin, Susanne Ström, Jessica Thorn, Jaana Tuomikangas is gratefully acknowledged. We acknowledge all the physicians, nurses and other research personnel at each center participating in the collection of patients:

### Physicians, nurses and other research personnel participating in the collection of the FinnDiane study subjects

| <b>FinnDiane Study Centers</b>                  | <b>Physicians and nurses</b>                                                               |
|-------------------------------------------------|--------------------------------------------------------------------------------------------|
| Anjalankoski Health Centre                      | S. Koivula, T. Uggeldahl                                                                   |
| Central Finland Central Hospital, Jyväskylä     | T. Forslund, A. Halonen, A. Koistinen, P. Koskiahho, M. Laukkanen, J. Saltevo, M. Tiihonen |
| Central Hospital of Åland Islands, Mariehamn    | M. Forsen, H. Granlund, A-C. Jonsson, B. Nyroos                                            |
| Central Hospital of Kanta-Häme, Hämeenlinna     | P. Kinnunen, A. Orvola, T. Salonen, A. Vähänen                                             |
| Central Hospital of Kymenlaakso, Kotka          | R. Paldanius, M. Riihelä, L. Ryysy                                                         |
| Central Hospital of Länsi-Pohja, Kemi           | H. Laukkanen, P. Nyländen, A. Sademies                                                     |
| Central Ostrbothnian Hospital District, Kokkola | S. Anderson, B. Asplund, U. Byskata, P. Liedes, M. Kuusela, T. Virkkala                    |
| City of Espoo Health Centre                     |                                                                                            |
| <i>Espoonlahti</i>                              | A. Nikkola, E. Ritola                                                                      |
| <i>Tapiola</i>                                  | M. Niska, H. Saarinen                                                                      |
| <i>Samaria</i>                                  | E. Oukko-Ruonen, T. Virtanen                                                               |
| <i>Viherlaakso</i>                              | A. Lyytinen                                                                                |
| City of Helsinki Health Centre                  |                                                                                            |
| <i>Puistola</i>                                 | H. Kari, T. Simonen                                                                        |
| <i>Suutarila</i>                                | A. Kaprio, J. Kärkkäinen, B. Rantaeskola                                                   |
| <i>Töölö</i>                                    | P. Kääriäinen, J. Haaga, A-L. Pietiläinen                                                  |
| City of Hyvinkää Health Centre                  | S. Klemetti, T. Nyandoto, E. Rontu, S. Satuli-Autere                                       |

SUPPLEMENTARY DATA

|                                                                                      |                                                                                                                                                                                                                                                                                                                                                                                                                                                                                                                                                                                                                                                                                                                                                                                                                                                                                                                   |
|--------------------------------------------------------------------------------------|-------------------------------------------------------------------------------------------------------------------------------------------------------------------------------------------------------------------------------------------------------------------------------------------------------------------------------------------------------------------------------------------------------------------------------------------------------------------------------------------------------------------------------------------------------------------------------------------------------------------------------------------------------------------------------------------------------------------------------------------------------------------------------------------------------------------------------------------------------------------------------------------------------------------|
| City of Vantaa Health Centre                                                         |                                                                                                                                                                                                                                                                                                                                                                                                                                                                                                                                                                                                                                                                                                                                                                                                                                                                                                                   |
| <i>Korso</i>                                                                         | R. Toivonen, H. Virtanen                                                                                                                                                                                                                                                                                                                                                                                                                                                                                                                                                                                                                                                                                                                                                                                                                                                                                          |
| <i>Länsimäki</i>                                                                     | R. Ahonen, M. Ivaska-Suomela, A. Jauhiainen                                                                                                                                                                                                                                                                                                                                                                                                                                                                                                                                                                                                                                                                                                                                                                                                                                                                       |
| <i>Martinlaakso</i>                                                                  | M. Laine, T. Pellonpää, R. Puranen                                                                                                                                                                                                                                                                                                                                                                                                                                                                                                                                                                                                                                                                                                                                                                                                                                                                                |
| <i>Myyrmäki</i>                                                                      | A. Airas, J. Laakso, K. Rautavaara                                                                                                                                                                                                                                                                                                                                                                                                                                                                                                                                                                                                                                                                                                                                                                                                                                                                                |
| <i>Rekola</i>                                                                        | M. Erola, E. Jatkola                                                                                                                                                                                                                                                                                                                                                                                                                                                                                                                                                                                                                                                                                                                                                                                                                                                                                              |
| <i>Tikkurila</i>                                                                     | R. Lönnblad, A. Malm, J. Mäkelä, E. Rautamo                                                                                                                                                                                                                                                                                                                                                                                                                                                                                                                                                                                                                                                                                                                                                                                                                                                                       |
| Heinola Health Centre                                                                | P. Hentunen, J. Lagerstam                                                                                                                                                                                                                                                                                                                                                                                                                                                                                                                                                                                                                                                                                                                                                                                                                                                                                         |
| Helsinki University Central Hospital, Department of Medicine, Division of Nephrology | A. Ahola, M. Ala-Korpela, M. Aronen, L. Bernardi, E. Fagerholm, J. Fagerudd, M. Feodoroff, C. Fogarty, C. Forsblom, D. Gordin, P-H. Groop, V. Harjutsalo, O. Heikkilä, K. Hietala, K. Holthöfer, A. Hoverfält, M. Hyvönen, E. Häppölä, P. Ihalmo, M. Kaunisto, S. Keskinen, S. Kinnunen, R. Kilpikari, L. Kyllönen, J.P. Kytö, M. Lehto, S. Lehtonen, S. Lindh, R. Lithovius, R. Masar, V. Mäkinen, S. Mäkimattila, M. Nymark, M. Parkkonen, T. Peltola, L. Peräneva, K. Pettersson-Fernholm, J. Pokki, H. Pyhäjärvi, M. Rosengård-Bärlund, M. Rönnback, R. Sallinen, A-R. Salonen, L. Salovaara, A. Sandelin, N. Sandholm, M. Saraheimo, L. Sjölin, T. Soppela, A. Soro-Paavonen, S. Ström, P.A. Summanen, J. Söderlund, J. Thorn, L. Thorn, A. Tiitu, H. Tikkanen, L. Tikkanen, V. Timgren, M. Tolonen, N. Tolonen, J. Tuomikan-gas, J. Vesa, T. Vesisenaho, N. Vuori, J. Wadén, J. Welin-Haapamäki, M. Wessman |
| Herttoniemi Hospital, Helsinki                                                       | V. Sipilä                                                                                                                                                                                                                                                                                                                                                                                                                                                                                                                                                                                                                                                                                                                                                                                                                                                                                                         |
| Hospital of Lounais-Häme, Forssa                                                     | T. Kalliomäki, J. Koskelainen, R. Nikkanen, N. Savolainen, H. Sulonen, E. Valtonen                                                                                                                                                                                                                                                                                                                                                                                                                                                                                                                                                                                                                                                                                                                                                                                                                                |
| Iisalmi Hospital                                                                     | E. Toivanen                                                                                                                                                                                                                                                                                                                                                                                                                                                                                                                                                                                                                                                                                                                                                                                                                                                                                                       |
| Jokilaakso Hospital, Jämsä                                                           | A. Parta, I. Pirttiniemi                                                                                                                                                                                                                                                                                                                                                                                                                                                                                                                                                                                                                                                                                                                                                                                                                                                                                          |
| Jorvi Hospital, Helsinki University Central Hospital                                 | S. Aranko, S. Ervasti, R. Kauppinen-Mäkelin, A. Kuusisto, T. Leppälä, K. Nikkilä, L. Pekkonen                                                                                                                                                                                                                                                                                                                                                                                                                                                                                                                                                                                                                                                                                                                                                                                                                     |
| Jyväskylä Health Centre, Kyllö                                                       | K. Nuorva, M. Tiihonen                                                                                                                                                                                                                                                                                                                                                                                                                                                                                                                                                                                                                                                                                                                                                                                                                                                                                            |
| Kainuu Central Hospital, Kajaani                                                     | S. Jokelainen, P. Kempainen, A-M. Mankinen, M. Sankari                                                                                                                                                                                                                                                                                                                                                                                                                                                                                                                                                                                                                                                                                                                                                                                                                                                            |
| Kerava Health Centre                                                                 | H. Stuckey, P. Suominen                                                                                                                                                                                                                                                                                                                                                                                                                                                                                                                                                                                                                                                                                                                                                                                                                                                                                           |
| Kirkkonummi Health Centre                                                            | A. Lappalainen, M. Liimatainen, J. Santaholma                                                                                                                                                                                                                                                                                                                                                                                                                                                                                                                                                                                                                                                                                                                                                                                                                                                                     |
| Kivelä Hospital, Helsinki                                                            | A. Aimolahti, E. Huovinen                                                                                                                                                                                                                                                                                                                                                                                                                                                                                                                                                                                                                                                                                                                                                                                                                                                                                         |
| Koskela Hospital, Helsinki                                                           | V. Ilkka, M. Lehtimäki                                                                                                                                                                                                                                                                                                                                                                                                                                                                                                                                                                                                                                                                                                                                                                                                                                                                                            |

SUPPLEMENTARY DATA

|                                     |                                                                                                                                                              |
|-------------------------------------|--------------------------------------------------------------------------------------------------------------------------------------------------------------|
| Kotka Heath Centre                  | E. Pälikkö-Kontinen, A. Vanhanen                                                                                                                             |
| Kouvola Health Centre               | E. Koskinen, T. Siitonen                                                                                                                                     |
| Kuopio University Hospital          | E. Huttunen, R. Ikäheimo, P. Karhapää, P. Kekäläinen, M. Laakso, T. Lakka, E. Lampainen, L. Moilanen, L. Niskanen, U. Tuovinen, I. Vauhkonen, E. Voutilainen |
| Kuusamo Health Centre               | T. Kääriäinen, E. Isopoussu                                                                                                                                  |
| Kuusankoski Hospital                | E. Kilki, I. Koskinen, L. Riihelä                                                                                                                            |
| Laakso Hospital, Helsinki           | T. Meriläinen, P. Poukka, R. Savolainen, N. Uhlenius                                                                                                         |
| Lahti City Hospital                 | A. Mäkelä, M. Tanner                                                                                                                                         |
| Lapland Central Hospital, Rovaniemi | L. Hyvärinen, S. Severinkangas, T. Tulokas                                                                                                                   |
| Lappeenranta Health Centre          | P. Linkola, I. Pulli                                                                                                                                         |
| Lohja Hospital                      | T. Granlund, M. Saari, T. Salonen                                                                                                                            |
| Loimaa Health Centre                | A. Mäkelä, P. Eloranta                                                                                                                                       |
| Länsi-Uusimaa Hospital, Tammisaari  | I-M. Jousmaa, J. Rinne                                                                                                                                       |
| Malmi Hospital, Helsinki            | H. Lanki, S. Moilanen, M. Tilly-Kiesi                                                                                                                        |
| Mikkeli Central Hospital            | A. Gynther, R. Manninen, P. Nironen, M. Salminen, T. Vääntinen                                                                                               |
| Mänttä Regional Hospital            | I. Pirttiniemi, A-M. Hänninen                                                                                                                                |
| North Karelian Hospital, Joensuu    | U-M. Henttula, P. Kekäläinen, M. Pietarinen, A. Rissanen, M. Voutilainen                                                                                     |
| Nurmijärvi Health Centre            | A. Burgos, K. Urtamo                                                                                                                                         |
| Oulankangas Hospital, Oulainen      | E. Jokelainen, P-L. Jylkkä, E. Kaarlela, J. Vuolaspuro                                                                                                       |
| Oulu Health Centre                  | L. Hiltunen, R. Häkkinen, S. Keinänen-Kiukaanniemi                                                                                                           |
| Oulu University Hospital            | R. Ikäheimo                                                                                                                                                  |
| Päijät-Häme Central Hospital        | H. Haapamäki, A. Helanterä, S. Hämäläinen, V. Ilvesmäki, H. Miettinen                                                                                        |
| Palokka Health Centre               | P. Sapanen, L. Welling                                                                                                                                       |
| Pieksämäki Hospital                 | V. Javtsenko, M. Tamminen                                                                                                                                    |
| Pietarsaari Hospital                | M-L. Holmbäck, B. Isomaa, L. Sarelin                                                                                                                         |
| Pori City Hospital                  | P. Ahonen, P. Merensalo, K. Sävelä                                                                                                                           |
| Porvoo Hospital                     | M. Kallio, B. Rask, S. Rämö                                                                                                                                  |

SUPPLEMENTARY DATA

|                                              |                                                                                                                                    |
|----------------------------------------------|------------------------------------------------------------------------------------------------------------------------------------|
| Raahe Hospital                               | A. Holma, M. Honkala, A. Tuomivaara, R. Vainionpää                                                                                 |
| Rauma Hospital                               | K. Laine, K. Saarinen, T. Salminen                                                                                                 |
| Riihimäki Hospital                           | P. Aalto, E. Immonen, L. Juurinen                                                                                                  |
| Salo Hospital                                | A. Alanko, J. Lapinleimu, P. Rautio, M. Virtanen                                                                                   |
| Satakunta Central Hospital, Pori             | M. Asola, M. Juhola, P. Kunelius, M-L. Lahdenmäki, P. Pääkkönen, M. Rautavirta                                                     |
| Savonlinna Central Hospital                  | T. Pulli, P. Sallinen, M. Taskinen, E. Tolvanen, H. Valtonen, A. Vartia                                                            |
| Seinäjoki Central Hospital                   | E. Korpi-Hyövälti, T. Latvala, E. Leijala                                                                                          |
| South Karelia Central Hospital, Lappeenranta | T. Ensala, E. Hussi, R. Härkönen, U. Nyholm, J. Toivanen                                                                           |
| Tampere Health Centre                        | A. Vaden, P. Alarotu, E. Kujansuu, H. Kirkkopelto-Jokinen, M. Helin, S. Gummerus, L. Calonius, T. Niskanen, T. Kaitala, T. Vatanen |
| Tampere University Hospital                  | I. Ala-Houhala, T. Kuningas, P. Lampinen, M. Määttä, H. Oksala, T. Oksanen, K. Salonen, H. Tauriainen, S. Tulokas                  |
| Tiirismaa Health Centre, Hollola             | T. Kivelä, L. Petlin, L. Savolainen                                                                                                |
| Turku Health Centre                          | I. Hämäläinen, H. Virtamo, M. Vähätalo                                                                                             |
| Turku University Central Hospital            | K. Breitholz, R. Eskola, K. Metsärinne, U. Pietilä, P. Saarinen, R. Tuominen, S. Äyräpää                                           |
| Vaajakoski Health Centre                     | K. Mäkinen, P. Sapanen                                                                                                             |
| Valkeakoski Regional Hospital                | S. Ojanen, E. Valtonen, H. Ylönen, M. Rautiainen, T. Immonen                                                                       |
| Vammala Regional Hospital                    | I. Isomäki, R. Kroneld, M. Tapiolinna-Mäkelä                                                                                       |
| Vaasa Central Hospital                       | S. Bergkulla, U. Hautamäki, V-A. Myllyniemi, I. Rusk                                                                               |

SUPPLEMENTARY DATA

**Supplementary Table 1. Clinical characteristics and laboratory measurements in patients with type 1 diabetes according to time of diagnosis of diabetes.**

| Variable (median, interquartile range) | <1975 (n=1,440)  | 1975–79 (n=517)  | 1980–84 (n=506)  | 1985 (n=1,318)   | p-value |
|----------------------------------------|------------------|------------------|------------------|------------------|---------|
| Age at onset of diabetes (yrs)         | 10.8 (6.0-15.2)  | 12.6 (8.2-20.3)  | 12.7 (7.7-21.5)  | 18.3 (12.4-25.6) | <0.0001 |
| Age at the end of follow-up (yrs)      | 39 (30-49)       | 36 (29-43)       | 33 (27-42)       | 29 (24-36)       | <0.0001 |
| BMI (kg/m <sup>2</sup> )               | 24.9 (22.8-27.2) | 25.2 (23.1-27.8) | 24.3 (22.3-26.8) | 24.1 (22.2-26.3) | <0.0001 |
| HbA <sub>1c</sub> (%)                  | 8.3 (7.6-9.1)    | 8.5 (7.6-9.5)    | 8.4 (7.5-9.4)    | 8.2 (7.2-9.2)    | 0.19    |
| SBP (mmHg)                             | 139 (127-153)    | 130 (121-143)    | 127 (119-137)    | 125 (117-135)    | <0.0001 |
| DBP (mmHg)                             | 79.0 (71.3-86.0) | 80.0 (75.0-88.0) | 80.0 (73.0-86.0) | 78.8 (71.0-84.0) | 0.0007  |
| Total cholesterol (mmol/l)             | 5.1 (4.5-5.7)    | 4.9 (4.4-5.6)    | 5.0 (4.3-5.6)    | 4.6 (4.0-5.2)    | <0.0001 |
| HDL-cholesterol (mmol/l)               | 1.3 (1.0-1.5)    | 1.3 (1.0-1.5)    | 1.3 (1.1-1.5)    | 1.3 (1.1-1.5)    | 0.46    |
| LDL-cholesterol (mmol/l)               | 3.2 (2.6-3.8)    | 3.0 (2.6-3.6)    | 3.1 (2.5-3.7)    | 2.7 (2.2-3.3)    | <0.0001 |
| Triglycerides (mmol/l)                 | 1.1 (0.8-1.5)    | 1.0 (0.8-1.4)    | 1.0 (0.8-1.4)    | 1.0 (0.8-1.4)    | 0.10    |
| Ever smoking (%)                       | 27               | 20               | 17               | 16               | <0.0001 |
